# Supplementary material
Source: publisher site journal article supplement (https://www.dovepress.com/article/573372)
Supplement: Supplementary file 1 [file 573372%20Supplementary%20Material.pdf]

## Supplementary Material

**Supplementary Table S1.** Primer sequences used in this study (5'–3').

| Target         | Forward primer (5'–3') | Reverse primer (5'–3')  |
|----------------|------------------------|-------------------------|
| GAPDH (mouse)  | AGGTCGGTGTGAACGGATTTG  | TGTAGACCATGTAGTTGAGGTCA |
| MAPK14 (mouse) | GGCTCGGCACACTGATGAT    | TGGGGTTCCAACGAGTCTTAAA  |
| ADM (mouse)    | CACCCTGATGTTATTGGGTTCA | TTAGCGCCCACTTATTCCACT   |
| MAPK8 (mouse)  | AGCAGAAGCAAACGTGACAAC  | GCTGCACACACTATTCCTTGAG  |

**Supplementary Figure S1.** Motif enrichment analysis of transcription factor binding motifs for the key-gene set using RcisTarget. Motif enrichment was performed using RcisTarget with rankings from rcistarget.hg19.motifdb.cisbpont.500bp; enrichment was quantified by the area under the recovery curve (AUC), and normalized enrichment scores (NES) was calculated by normalizing motif AUC values to the background distribution across all motifs. The complete list of enriched motifs (NES > 3.0), inferred motif-TF annotations, and enrichment statistics is provided in Supplementary Table S2. (A) Global mean  $\pm$  SD estimation derived from background motifs. (B–D) Enrichment recovery curves for representative enriched motifs, including cisbp\_\_M0666 (NES = 8.25; enriched genes: ADM and MAPK14) (B), cisbp\_\_M0673 (C), and cisbp\_\_M2054 (D).

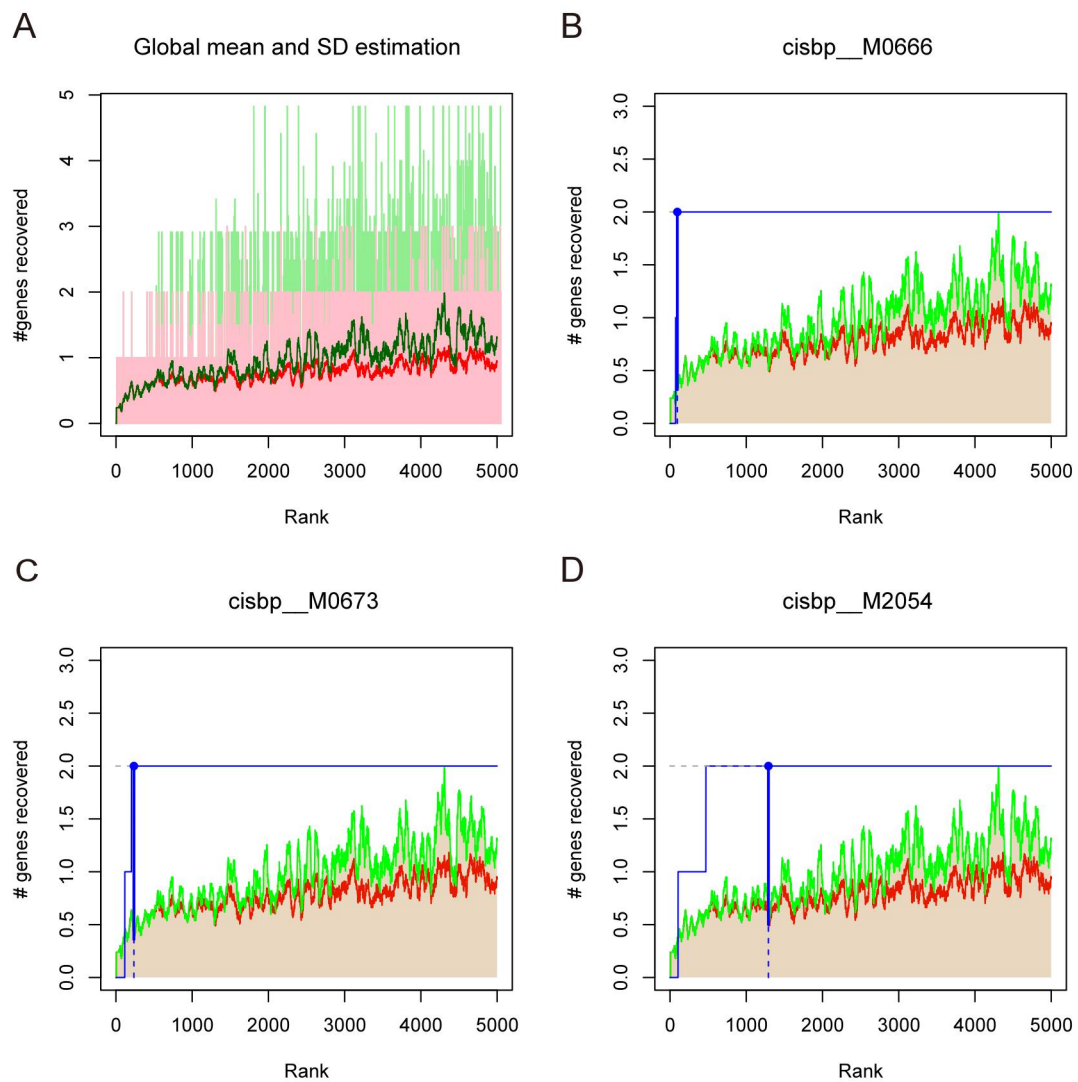

**Supplementary Table S2.** Results of transcription factor motif enrichment analysis for the key-gene set. Significantly enriched motifs (NES > 3.0) are listed with their motif identifiers, high-confidence TF annotations (TF\_highConf), normalized enrichment scores (NES), area under the recovery curve (AUC), and enriched genes contributing to each motif.

| <b>Motif</b> | <b>Gene set</b> | <b>TF (high confidence)</b>    | <b>NES</b> | <b>AUC</b> | <b>nEnrGenes</b> | <b>Enriched genes</b> |
|--------------|-----------------|--------------------------------|------------|------------|------------------|-----------------------|
| cisbp__M0666 | key_gene        |                                | 8.25       | 0.616      | 2                | ADM; MAPK14           |
| cisbp__M0673 | key_gene        |                                | 7.62       | 0.571      | 2                | ADM; MAPK14           |
| cisbp__M2054 | key_gene        |                                | 6.54       | 0.494      | 2                | ADM; MAPK8            |
| cisbp__M0678 | key_gene        |                                | 6.52       | 0.492      | 2                | ADM; MAPK14           |
| cisbp__M1781 | key_gene        |                                | 6.18       | 0.468      | 2                | ADM; MAPK14           |
| cisbp__M4536 | key_gene        | E2F1<br>(directAnnotation)     | 5.98       | 0.454      | 2                | ADM; MAPK14           |
| cisbp__M1789 | key_gene        |                                | 5.76       | 0.438      | 2                | ADM; MAPK14           |
| cisbp__M0677 | key_gene        |                                | 5.52       | 0.421      | 2                | ADM; MAPK14           |
| cisbp__M0675 | key_gene        |                                | 5.38       | 0.411      | 2                | ADM; MAPK14           |
| cisbp__M0613 | key_gene        | MBD1<br>(inferredBy_Orthology) | 5.17       | 0.396      | 2                | ADM; MAPK14           |
